# Supplementary material for: Bandgap broadly tunable GaZnSeAs alloy nanowires
Source: Royal Society of Chemistry journal article supplement (doi:10.1039/c2cp43718j), 2013-01-01
Supplement: c2cp43718j.pdf [file c2cp43718j.pdf]

## Electronic Supplementary Information

### Bandgap Broadly Tunable GaZnSeAs Alloy Nanowires

Yicheng Wang, Jinyou Xu, Pinyun Ren, Qinglin Zhang, Xiujuan Zhuang, Xiaoli Zhu,

Qiang Wan,\* Hong Zhou, Wei Hu, and Anlian Pan\*

Key Laboratory for Micro-Nano Physics and Technology of Hunan Province, State Key Laboratory of Chemo/Biosensing and Chemometrics, College of Physics and Microelectronics Science, Hunan University, Changsha (410082), China

E-mail: [anlian.pan@hnu.edu.cn](mailto:anlian.pan@hnu.edu.cn), [wanqiang@hnu.edu.cn](mailto:wanqiang@hnu.edu.cn)

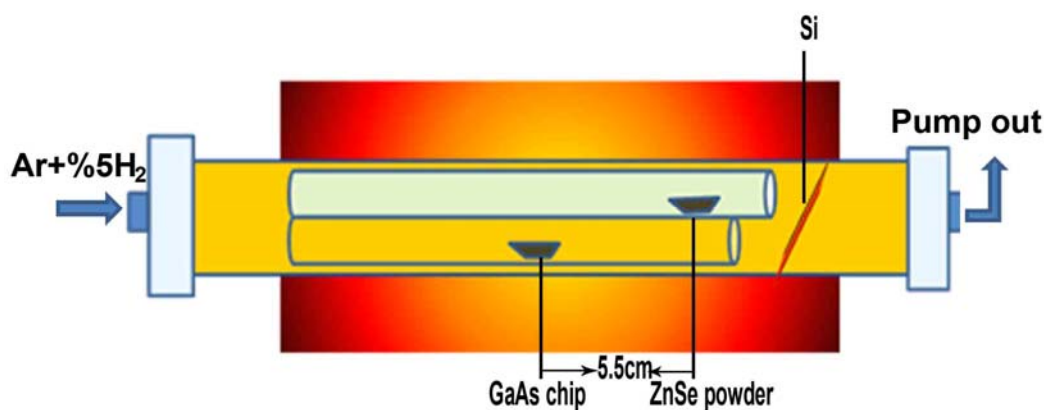

**Fig. S1.** Experimental installation for the synthesis of GaZnSeAs quaternary alloy nanowires

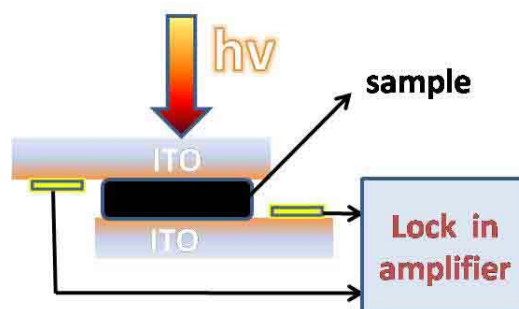

**Fig. S2.** Schematic illustration of the experimental setup for the SPV measurement.

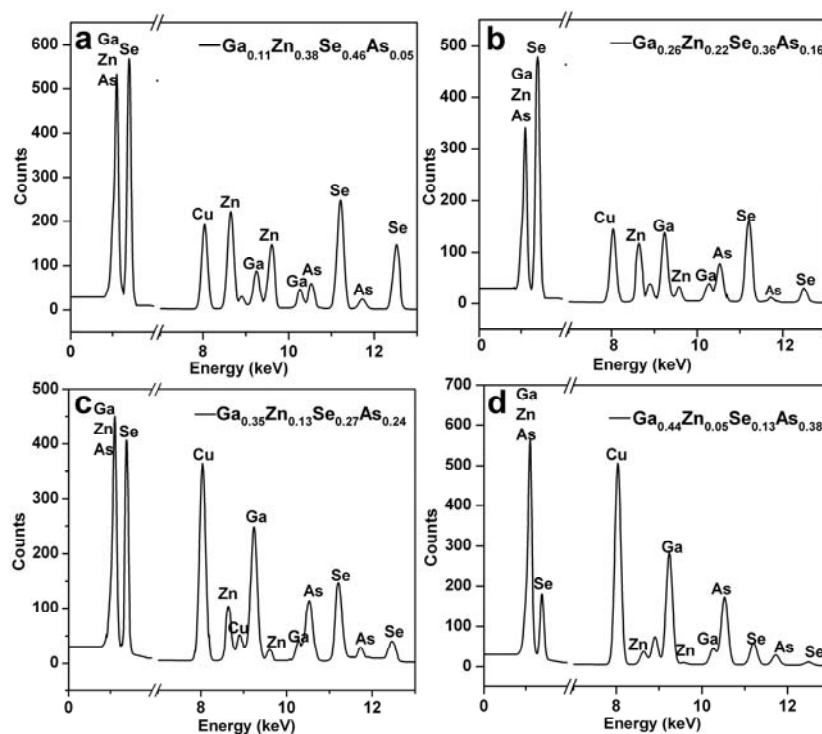

**Fig. S3.** (a), (b), (c), (d): In-situ energy-dispersive X-ray spectra of quaternary alloy nanowires taken from four typical regions along the length of the sample, and element content determined by TEM-EDX detector.
